# Supplementary material
Source: Research Square preprint supplement (doi:10.21203/rs.3.rs-9621965/v1)
Supplement: Supplementary file 1 [file 6539957a4965fb6fd77e78e9.pdf]

# Antibiotic Prescribing behaviour aligned with COM-B

## Nodes

| Name                                            | Description                                                                                                                                                                                              |
|-------------------------------------------------|----------------------------------------------------------------------------------------------------------------------------------------------------------------------------------------------------------|
| <b>1. DETERMINANTS OF PRESCRIBING BEHAVIOUR</b> | <b>All codes on Knowledge, skills and reasoning including understanding correct prescribing principles, guidelines and confidence in prescribing and provider's understanding AMR, its consequences.</b> |
| 1.1 Capability. Knowledge, skills and reasoning |                                                                                                                                                                                                          |
| Appropriate prescribing knowledge               |                                                                                                                                                                                                          |
| Alternative information sources                 |                                                                                                                                                                                                          |
| Guideline awareness or use                      |                                                                                                                                                                                                          |
| Types of guidelines                             |                                                                                                                                                                                                          |
| Confidence in prescribing                       |                                                                                                                                                                                                          |
| Self-assessed ability                           |                                                                                                                                                                                                          |
| Knowledge of AMR                                |                                                                                                                                                                                                          |

| Name                                       | Description |
|--------------------------------------------|-------------|
| Understanding AMR as resistance            |             |
| Perceived AMR consequences                 |             |
| Death                                      |             |
| Treatment failure                          |             |
| 1.1.2 Clinical decision-making             |             |
| AMR vs recovery trade-off                  |             |
| Guideline deviation                        |             |
| Intuitive or quick decisions prescribing   |             |
| Limited diagnostic use                     |             |
| Patient-centered goals                     |             |
| Preference for clinical judgment over labs |             |
| Steps from history → diagnosis → treatment |             |
| Workload impact on decisions               |             |

| Name                                                            | Description                                                                                                                                                                                                                                                                          |
|-----------------------------------------------------------------|--------------------------------------------------------------------------------------------------------------------------------------------------------------------------------------------------------------------------------------------------------------------------------------|
| <b>1.2 Opportunity. Social &amp; Environmental Determinants</b> | All codes on Social, Environmental influences, Socioeconomic constraints, diagnostic limitations, Workload/staff shortages, health system inefficiencies, support systems & regulation, digital tools Audit & feedback, Training exposure Implementation barriers and AMS structures |
| 1.2.1 Social influences                                         |                                                                                                                                                                                                                                                                                      |
| Community expectations                                          |                                                                                                                                                                                                                                                                                      |
| Patient pressure                                                |                                                                                                                                                                                                                                                                                      |
| Socioeconomic constraints                                       |                                                                                                                                                                                                                                                                                      |
| 1.2.2 Environmental context                                     |                                                                                                                                                                                                                                                                                      |
| AMS structures                                                  |                                                                                                                                                                                                                                                                                      |
| Committees, stewardship efforts to discuss AMR                  |                                                                                                                                                                                                                                                                                      |
| Audit & feedback                                                |                                                                                                                                                                                                                                                                                      |
| Influence of colleagues                                         |                                                                                                                                                                                                                                                                                      |
| Influence of supervision                                        |                                                                                                                                                                                                                                                                                      |
| Diagnostic limitations                                          |                                                                                                                                                                                                                                                                                      |

| Name                               | Description |
|------------------------------------|-------------|
| Lack of lab tests                  |             |
| Digital tools                      |             |
| Use of apps (e.g.,<br>Medscape)    |             |
| Drug availability<br>constraints   |             |
| Prescribing based on<br>stock      |             |
| Health system<br>inefficiencies    |             |
| Supply chain failures              |             |
| Implementation barriers            |             |
| System prevents<br>behavior change |             |
| Prescribing based on<br>stock      |             |
| Drug availability<br>constraints   |             |

| Name                                                  | Description                                                                                                                                                        |
|-------------------------------------------------------|--------------------------------------------------------------------------------------------------------------------------------------------------------------------|
| Support Systems & Regulation                          |                                                                                                                                                                    |
| Use of structured guidelines                          |                                                                                                                                                                    |
| Training exposure                                     |                                                                                                                                                                    |
| AMR-related training                                  |                                                                                                                                                                    |
| Workload or staff shortages                           |                                                                                                                                                                    |
| High patient load                                     |                                                                                                                                                                    |
| <b>2. SYSTEMS IMPROVEMENT &amp; AMS INTERVENTIONS</b> | <b>All codes on System strengthening including diagnostics, training, policy, stewardship tools, public health, facility improvements and community engagement</b> |
| 2.1 System strengthening                              |                                                                                                                                                                    |
| Need better budgeting                                 |                                                                                                                                                                    |
| Supply chain improvement                              |                                                                                                                                                                    |
| 2.1.2 Diagnostics                                     |                                                                                                                                                                    |
| Diagnostics expansion                                 |                                                                                                                                                                    |
| Improve lab capacity                                  |                                                                                                                                                                    |

| Name                             | Description |
|----------------------------------|-------------|
| Need culture and sensitivity     |             |
| 2.1.3 Training                   |             |
| AMR education                    |             |
| Staff awareness programs         |             |
| 2.1.4 Policy                     |             |
| Data-driven planning             |             |
| Quantify cases for budgeting     |             |
| Use DHIS for planning            |             |
| 2.1.5 Stewardship tools          |             |
| Show impact of resistance        |             |
| Use of videos or pictorial tools |             |
| Visual AMR evidence              |             |
| 2.1.6 Public health              |             |
| Mass awareness                   |             |

| Name                                       | Description                                                                                                                                                                                      |
|--------------------------------------------|--------------------------------------------------------------------------------------------------------------------------------------------------------------------------------------------------|
| Mass Media campaigns or communication      |                                                                                                                                                                                                  |
| 2.1.7 Facility improvements                |                                                                                                                                                                                                  |
| Improve facility systems                   |                                                                                                                                                                                                  |
| Improve service delivery                   |                                                                                                                                                                                                  |
| Internal workflow or system fixes          |                                                                                                                                                                                                  |
| 2.1.8 Community engagement                 |                                                                                                                                                                                                  |
| Community feedback influence               |                                                                                                                                                                                                  |
| Manage expectations                        |                                                                                                                                                                                                  |
| <b>3. MOTIVATION. BELIEFS AND EMOTIONS</b> | <b>ALL codes on beliefs and emotions including fear of complications, emotional prescribing, beliefs about effectiveness, patient satisfaction concern, and consequences of not prescribing.</b> |
| Beliefs about effectiveness                |                                                                                                                                                                                                  |
| Metronidazole helps wounds                 |                                                                                                                                                                                                  |
| Non-evidence-based practices               |                                                                                                                                                                                                  |
| Consequences of not prescribing            |                                                                                                                                                                                                  |

| Name                                  | Description |
|---------------------------------------|-------------|
| Consultation takes longer             |             |
| Fear of dissatisfaction               |             |
| Emotional prescribing                 |             |
| Decisions influenced by stress        |             |
| Give drugs with less side effects     |             |
| Give stronger drugs                   |             |
| Empathy                               |             |
| Desire to relieve suffering           |             |
| Patient feel better                   |             |
| Fear of complications                 |             |
| Avoid worsening illness               |             |
| Patient satisfaction concern          |             |
| Need to meet expectations             |             |
| Patients feel untreated without drugs |             |

| Name                                          | Description                                                                                                                                             |
|-----------------------------------------------|---------------------------------------------------------------------------------------------------------------------------------------------------------|
| <b>4. OPTIMISM AND INTENTIONS (AMS FOCUS)</b> | <b>All codes on optimism and intentions including perceived belief and value of UCG and new or emerging prescribing issues and optimism for change.</b> |
| Intention to adhere                           |                                                                                                                                                         |
| Willingness to follow guidelines              |                                                                                                                                                         |
| New or emerging prescribing issues            |                                                                                                                                                         |
| All mothers go with antibiotics               |                                                                                                                                                         |
| Knowledge or practice gaps among staff        |                                                                                                                                                         |
| Midwives don't understand AMR                 |                                                                                                                                                         |
| Optimism for change                           |                                                                                                                                                         |
| Belief system improvements help               |                                                                                                                                                         |
| Perceived belief and value of UCG             |                                                                                                                                                         |
| Guidelines help reduce AMR                    |                                                                                                                                                         |
| Structural barriers                           |                                                                                                                                                         |
| Limits to adherence                           |                                                                                                                                                         |

| Name                                                                              | Description                                                                    |
|-----------------------------------------------------------------------------------|--------------------------------------------------------------------------------|
| Stock-outs prevent adherence                                                      |                                                                                |
| <b>5. RECOMMENDATIONS OR SUGGESTED INNOVATIONS ANTIBIOTIC PRESCRIPTION OR AMS</b> | All codes on suggestions for AMS at individual, community and facility levels. |
| Community                                                                         |                                                                                |
| Facility levels.                                                                  |                                                                                |
| Individual                                                                        |                                                                                |
